# Supplementary material for: Obesity Strongly Predicts COVID-19-Related Major Clinical Adverse Events in Coptic Clergy
Source: MDPI journal article supplement (doi:10.3390/jcm10132752), 2021-06-22
Supplement: s1 [file s1]

## Supplementary Materials

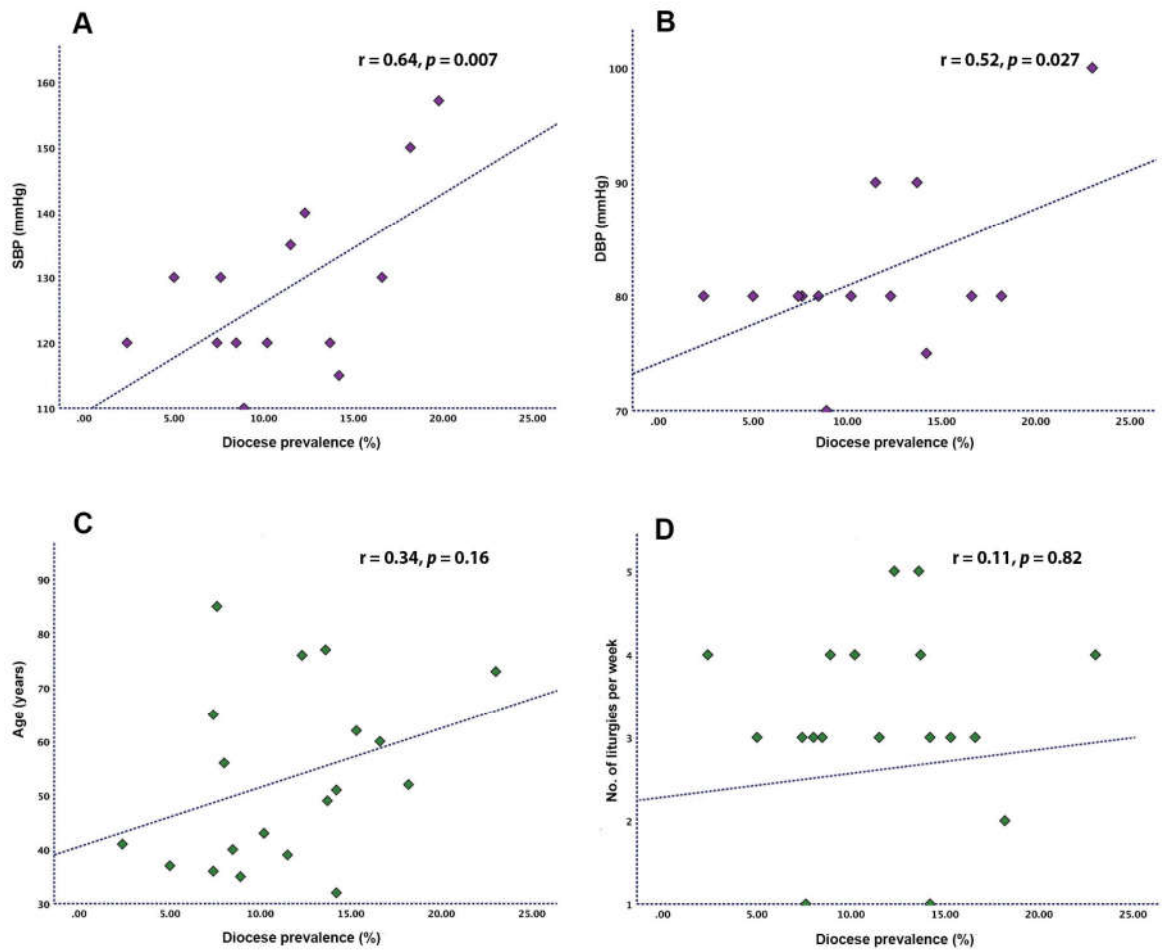

**Figure S1.** Influence analysis (without dioceses with high prevalence disease) of relationship between risk factors and prevalence of COVID-19 among clergy. (A) Prevalence disease with SBP; (B) prevalence disease with DBP; (C) prevalence disease with age; (D) prevalence disease with number of liturgies per week. SBP: systolic blood pressure; DBP: diastolic blood pressure.

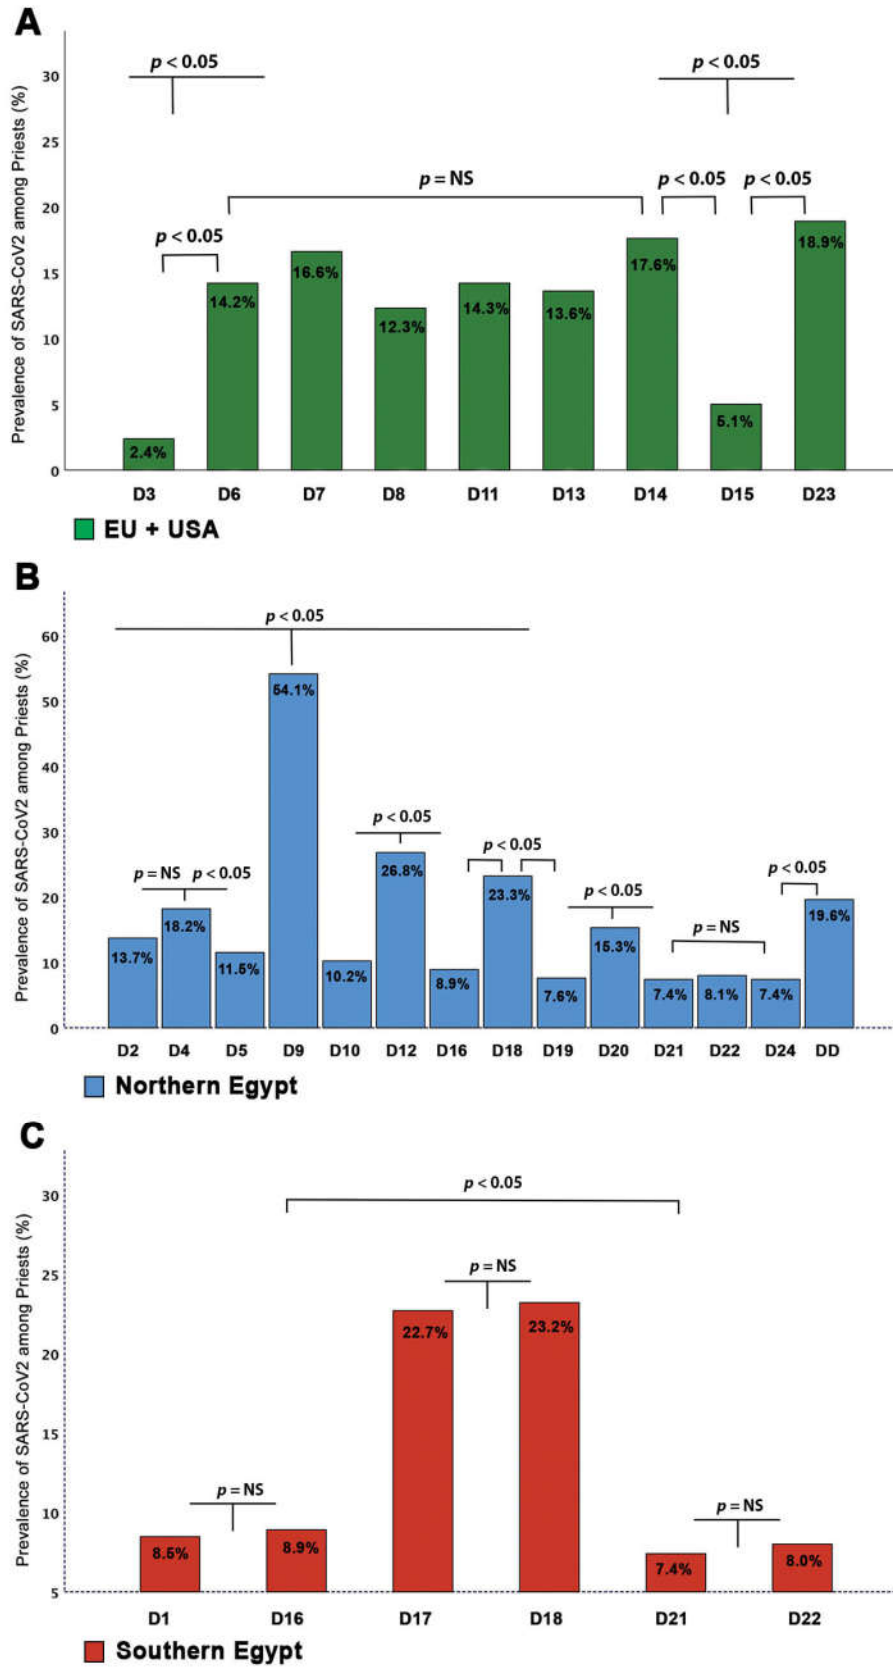

**Figure S2.** Prevalence of SARS-CoV2 among priests in different diocese; (A) EU + USA; (B) Northern Egypt; (C) Southern Egypt.
